# Supplementary material for: Pyridine synthesis by reactions of allyl amines and alkynes proceeding through a Cu(OAc)2 oxidation and Rh(iii)-catalyzed N-annulation sequence
Source: Royal Society of Chemistry journal article supplement (doi:10.1039/c2cc36699a), 2012-01-01

## Electronic Supplementary Information

### Pyridine Synthesis by Reactions of Allyl Amines and Alkynes Proceeding through a Cu(OAc)<sub>2</sub> Oxidation and Rh(III)-Catalyzed N- Annulation Sequence

Dong-Su Kim, Jung-Woo Park and Chul-Ho Jun\*

Department of Chemistry, Yonsei University, 50 Yonseiro, Seodaemun-gu, Seoul 120-749, Korea.

#### Contents

|                                                                                                |           |
|------------------------------------------------------------------------------------------------|-----------|
| <b>1. General</b> .....                                                                        | <b>S2</b> |
| <b>2. Materials</b> .....                                                                      | <b>S2</b> |
| <b>3. Experimental</b> .....                                                                   | <b>S3</b> |
| A typical procedure for synthesis of pyridines from allyl amines and alkynes<br>(Table 2)..... | <b>S3</b> |
| Characterization data for 5n and 5o (Scheme 2).....                                            | <b>S7</b> |
| <b>4. <sup>1</sup>H and <sup>13</sup>C NMR spectra of new compounds</b> .....                  | <b>S8</b> |

## 1. General

Flash column chromatography was performed using E. Merck 230-400 mesh silica gel and column chromatography was monitored by analytical thin-layer chromatography (TLC) carried out on 0.25 Merck silica gel plates (60F-254) using UV light as a visualizing agent, *p*-anisaldehyde, ninhydrin and KMnO<sub>4</sub> solution as staining solutions, and heat as developing agent. Gas chromatographic analyses were performed on Agilent 7890A instrument with FID detector and an Agilent HP-5 capillary column. Mass chromatography analyses were performed on Agilent 5975C instrument and an Agilent HP-5MS column. IR spectra were recorded using a Bruker Vertex 70 FT-IR spectrometer. <sup>1</sup>H NMR and <sup>13</sup>C NMR were recorded on a Bruker Advance II/DPX 400(400 MHz <sup>1</sup>H, 100 MHz <sup>13</sup>C) spectrometers with chemical shifts reported relative to residual deuterated solvent peaks. <sup>1</sup>H NMR spectra were referenced to CDCl<sub>3</sub> (for <sup>1</sup>H, δ = 7.26) as internal standard, and are reported as follows: chemical shift multiplicity (br = broad, s = singlet, d = doublet, t = triplet, q = quartet, m = multiplet). <sup>13</sup>C NMR spectra were referenced to the residual CDCl<sub>3</sub> (for <sup>13</sup>C, δ = 77.26) as internal standard]. High-resolution Mass spectra were provided by NCIRF Seoul national university.

## 2. Materials

Most commercially available reagent grade chemicals (**1a**, **1c**, **1e**, **2a**, **2b-2e** and **4**) were purchased from Aldrich Chemical Company, TCI, ACROS and Burdick & Jackson, and used as received without further purification unless otherwise stated. Reagents (**1b**,<sup>1</sup> **1d**,<sup>2</sup> and **1f**<sup>3</sup>) and Complexes [Cp\*RhCl<sub>2</sub>]<sub>2</sub> (**3**)<sup>4</sup> were prepared according to the literature procedure and stored in a refrigerator under N<sub>2</sub> atmosphere.

## 3. Experiments

---

<sup>1</sup> D. N. Kimpe and D. D. Smaele, *Tetrahedron* 1995, **51**, 5465.

<sup>2</sup> A. M. Schmidt and P. Eilbracht, *J. Org. Chem.*, 2005, **70**, 5528.

<sup>3</sup> A. I. Meyers, J. P. Lawson and D. R. Carver, *J. Org. Chem.*, 1981, **46**, 3119.

<sup>4</sup> J. W. Kang, K. Moseley and P. M. Maitlis, *J. Am. Chem. Soc.* 1969, **91**, 5970..

### - Evidence for dehydrogenation of allylamine by Cu(OAc)<sub>2</sub>

In order to investigate the formation of  $\alpha,\beta$ -unsaturated imine by Cu(II)-promoted oxidation of allylamine, the reaction of 2-methylallylamine (**1a**) with 1 equivalent of Cu(OAc)<sub>2</sub> (**4**) at 100 °C for 30 min was carried out. The reaction resulted in the formation of 2-methyl-N-(2-methylallylidene)prop-2-en-1-amine (**6c**, 28% GC yield), which is identical to the authentic sample, prepared by methacrolein and 2-methylallylamine. This might be formed through Cu(OAc)<sub>2</sub> promoted oxidation of 2-methylallylamine (**1a**) to form **6a** and followed by transamination of **6a** with **1a**.

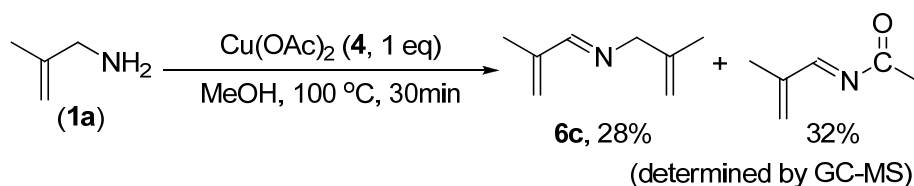

### - A typical procedure for synthesis of pyridines from allyl amines and alkynes (Table 2, entry 1)

A 1 ml pressure vial was charged with 2-methylallylamine (**1a**, 14 mg (0.2 mmol)), 4-octyne (**2a**, 26.4 mg, (0.24 mmol)), [Cp\**Rh*Cl<sub>2</sub>]<sub>2</sub> (**3**, 1.5 mg (0.00625 mmol)), Cu(OAc)<sub>2</sub>·H<sub>2</sub>O (**4**, 80 mg (0.4 mmol)) and methanol (200  $\mu$ l). The reaction mixture was stirred at 100 °C preheated oil-bath for 4 hours. After cooling the vessel to room temperature, the crude mixture was purified by column chromatography (*n*-hexane:ethyl acetate = 2:1) on silica gel to give 5-methyl-2,3-dipropylpyridine (**5a**, 81.6mg, 92 %) as a pale yellow oil.

**5-methyl-2,3-dipropylpyridine (5a)** yellow oil, <sup>1</sup>H NMR (400 MHz, CDCl<sub>3</sub>)  $\delta$  8.16 (d, *J* = 1.6 Hz, 1H), 7.17 (d, *J* = 1.7 Hz, 1H), 2.68 (t, *J* = 7.7 Hz, 2H), 2.51 (t, *J* = 7.7 Hz, 2H), 2.21 (s, 3H), 1.72-1.63 (m, 2H), 1.60-1.51 (m, 2H), 0.97-0.92 (m, 6H); <sup>13</sup>C NMR (100 MHz, CDCl<sub>3</sub>)  $\delta$  157.2, 147.1, 137.1, 134.7, 130.1, 36.6, 34.3, 24.0, 23.1, 18.0, 14.3, 14.2; IR spectrum (CDCl<sub>3</sub>) 2960, 2931, 2871, 1734, 1565, 1459, 964 cm<sup>-1</sup>; HR-MS(EI<sup>+</sup>) calcd for C<sub>12</sub>H<sub>19</sub>N [M]<sup>+</sup> 177.1517; found 177.1513.

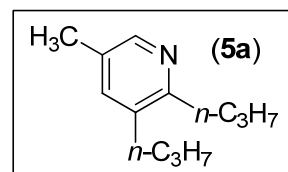

**5-methyl-2,3-dipentylpyridine (5b)** yellow oil, <sup>1</sup>H NMR (400 MHz, CDCl<sub>3</sub>)  $\delta$  8.17 (s, 1H), 7.19 (s, 1H), 2.71 (t, *J* = 8.1 Hz, 2H), 2.53 (t, *J* = 8.0

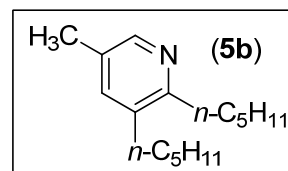

Hz, 2H), 2.23 (s, 3H), 1.68-1.62 (m, 2H), 1.56-1.52 (m, 2H), 1.35-1.33 (m, 8H), 0.91-0.86 (m, 6H);  $^{13}\text{C}$  NMR (100 MHz,  $\text{CDCl}_3$ )  $\delta$  157.5, 147.1, 137.5, 134.9, 130.2, 34.7, 32.3, 32.2, 32.0, 30.7, 29.7, 22.8, 22.7, 18.1, 14.2, 14.1; IR spectrum ( $\text{CDCl}_3$ ) 2957, 2928, 2859, 1602, 1564, 1461, 1379, 886, 726, 569  $\text{cm}^{-1}$ ; HR-MS(EI+) calcd for  $\text{C}_{16}\text{H}_{27}\text{N}$   $[\text{M}]^+$  233.2143; found 233.2145.

**2,3-bis(methoxymethyl)-5-methylpyridine (5c)** yellow oil,  $^1\text{H}$  NMR (400 MHz,  $\text{CDCl}_3$ )  $\delta$  8.31 (s, 1H), 7.57 (s, 1H), 4.59 (s, 2H), 4.54 (s, 2H), 3.43 (s, 3H), 3.38 (s, 3H), 2.32 (s, 3H);  $^{13}\text{C}$  NMR (100 MHz,  $\text{CDCl}_3$ )  $\delta$  152.3, 148.5, 136.9, 132.9, 132.6, 74.3, 70.8, 58.8, 58.5, 18.3; IR spectrum ( $\text{CDCl}_3$ ) 2928, 2873, 2823, 1729, 1440, 1378, 1300, 1099, 1086  $\text{cm}^{-1}$ ; HR-MS(CI+) calcd for  $\text{C}_{10}\text{H}_{16}\text{NO}_2$   $[\text{M}+\text{H}]^+$  182.1176; found 182.1185.

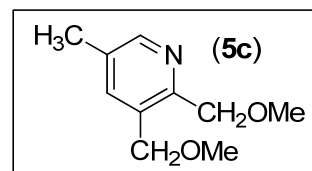

**2,3,5-trimethylpyridine (5d)** [CAS No. 695-98-7] colorless oil,  $^1\text{H}$  NMR (400 MHz,  $\text{CDCl}_3$ )  $\delta$  8.11 (s, 1H), 7.17 (s, 1H), 2.41 (s, 3H), 2.22 (s, 3H), 2.20 (s, 3H);  $^{13}\text{C}$  NMR (100 MHz,  $\text{CDCl}_3$ )  $\delta$  154.1, 146.8, 138.0, 130.9, 130.5, 22.2, 19.1, 18.0.

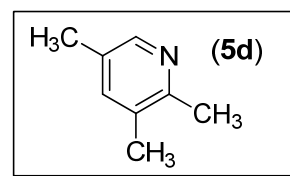

**5-phenyl-2,3-dipropylpyridine (5e)** yellow oil,  $^1\text{H}$  NMR (400 MHz,  $\text{CDCl}_3$ )  $\delta$  8.61 (d,  $J = 2.2$  Hz, 1H), 7.60 (d,  $J = 2.2$  Hz, 1H), 7.58-7.55 (m, 2H), 7.47-7.43 (m, 2H), 7.37 (tt,  $J = 6.5$  Hz, 1.2 Hz, 1H), 2.83-2.79 (m, 2H), 2.68-2.64 (m, 2H), 1.83-1.74 (m, 2H), 1.72-1.62 (m, 2H), 1.03 (q,  $J = 7.3$  Hz, 6H);  $^{13}\text{C}$  NMR (100 MHz,  $\text{CDCl}_3$ )  $\delta$  159.3, 145.2, 138.4, 135.4, 135.3, 134.1, 129.1, 127.8, 127.2, 36.9, 34.5, 24.0, 23.1, 14.5, 14.3; IR spectrum ( $\text{CDCl}_3$ ) 3060, 3028, 2960, 2930, 2870, 1601, 1456, 1392, 762, 697  $\text{cm}^{-1}$ ; HR-MS(EI+) calcd for  $\text{C}_{17}\text{H}_{21}\text{N}$   $[\text{M}]^+$  239.1674; found 239.1670.

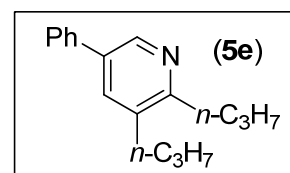

**3,4-dipropyl-5,6,7,8-tetrahydroisoquinoline (5f)** yellow oil,  $^1\text{H}$  NMR (400 MHz,  $\text{CDCl}_3$ )  $\delta$  8.08 (s, 1H), 2.72-2.66 (m, 6H), 2.54-2.50 (m, 2H), 1.80-1.65 (m, 6H), 1.52-1.42 (m, 2H), 1.04-0.97 (m, 6H);  $^{13}\text{C}$  NMR (100 MHz,  $\text{CDCl}_3$ )  $\delta$  157.0, 147.4, 144.3, 133.4, 130.3, 37.2, 30.3, 26.9, 26.1, 23.6, 23.3, 23.2, 22.4, 14.9, 14.6; IR spectrum ( $\text{CDCl}_3$ ) 3043, 2930, 2870, 1693, 1581, 1561, 1456,

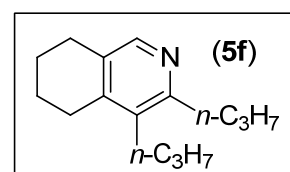

1436, 1407, 1357, 1255, 1196, 1089, 970, 781  $\text{cm}^{-1}$ ; HR-MS(EI+) calcd for  $\text{C}_{15}\text{H}_{23}\text{N}$   $[\text{M}]^+$  217.1830; found 217.1833.

**6-phenyl-2,3-dipropylpyridine (5g)** yellow oil,  $^1\text{H}$  NMR (400 MHz,  $\text{CDCl}_3$ )  $\delta$  8.00 (d,  $J = 7.2$  Hz, 2H), 7.49-7.42 (m, 4H), 7.36 (t,  $J = 7.3$  Hz, 1H), 2.84 (t,  $J = 7.6$  Hz, 2H), 2.63 (t,  $J = 7.6$  Hz, 2H), 1.91-1.81 (m, 2H), 1.69-1.60 (m, 2H), 1.06-0.99 (m, 6H);  $^{13}\text{C}$  NMR (100 MHz,  $\text{CDCl}_3$ )  $\delta$  160.0, 154.3, 140.1, 137.5, 133.9, 128.8, 128.5, 126.9, 117.8, 37.1, 34.2, 24.0, 22.8, 14.5, 14.3; IR spectrum ( $\text{CDCl}_3$ ) 3061, 3034, 2960, 2931, 2870, 1687, 1564, 1456, 1379, 756, 694  $\text{cm}^{-1}$ ; HR-MS(EI+) calcd for  $\text{C}_{17}\text{H}_{21}\text{N}$   $[\text{M}]^+$  239.1674; found 239.1675.

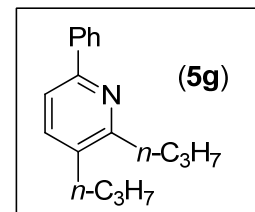

**5-methyl-2,3-diphenylpyridine (5h)** [CAS No. 122801-45-0] white solid, mp = 125-126  $^\circ\text{C}$ ,  $^1\text{H}$  NMR (400 MHz,  $\text{CDCl}_3$ ) 8.52 (s, 1H), 7.54 (s, 1H), 7.34-7.32 (m, 2H), 7.26-7.21 (m, 6H), 7.18-7.16 (m, 2H), 2.42 (s, 3H);  $^{13}\text{C}$  NMR (100 MHz,  $\text{CDCl}_3$ )  $\delta$  154.7, 149.0, 140.3, 140.2, 139.3, 135.7, 131.8, 130.0, 129.7, 128.4, 128.0, 127.7, 127.3, 18.2.

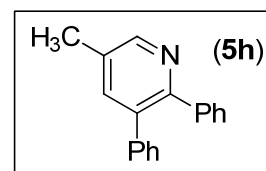

**(E)-2-(2-(1,2-diphenylvinyl)phenyl)-5-methyl-3-phenylpyridine (5i)** white solid, mp = 105-107  $^\circ\text{C}$ ,  $^1\text{H}$  NMR (400 MHz,  $\text{CDCl}_3$ )  $\delta$  8.16 (s, 1H), 7.48 (d,  $J = 7.4$  Hz, 1H), 7.38 (t,  $J = 7.4$  Hz, 1H), 7.31-7.23 (m, 5H), 7.05-6.97 (m, 7H), 6.92 (t,  $J = 7.4$ , 2H), 6.79-6.78 (m, 2H), 6.42 (d,  $J = 7.2$ , 2H), 5.82 (s, 1H), 2.26 (s, 3H);  $^{13}\text{C}$  NMR (100 MHz,  $\text{CDCl}_3$ )  $\delta$

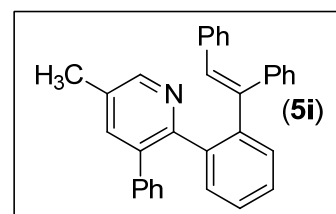

155.2, 148.4, 143.7, 142.0, 140.3, 140.1, 139.9, 138.1, 137.7, 135.9, 131.56, 131.52, 130.7, 130.5, 130.0, 129.7, 129.5, 128.3, 127.9, 127.8, 127.7, 127.0, 126.7, 126.6, 18.21; IR spectrum ( $\text{CDCl}_3$ ) 3078, 3055, 3021, 2974, 2925, 2866, 2739, 1950, 1737, 1598, 1492, 1424, 1117, 759, 696  $\text{cm}^{-1}$ ; HR-MS(EI+) calcd for  $\text{C}_{32}\text{H}_{25}\text{N}$   $[\text{M}]^+$  423.1987; found 423.1993

**2,3,5-triphenylpyridine (5j)** white solid, mp = 121-122  $^\circ\text{C}$ ,  $^1\text{H}$  NMR (400 MHz,  $\text{CDCl}_3$ )  $\delta$  8.92 (d,  $J = 1.9$  Hz, 1H), 7.92 (d,  $J = 2.2$  Hz, 1H), 7.69-7.66 (m, 2H), 7.52-7.48 (m, 2H), 7.44-7.39 (m, 3H), 7.32-7.28 (m, 3H), 7.26-7.23

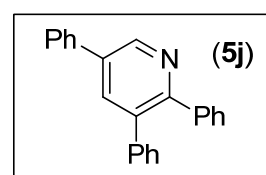

(m, 5H);  $^{13}\text{C}$  NMR (100 MHz,  $\text{CDCl}_3$ )  $\delta$  156.1, 146.9, 140.1, 140.0, 137.6, 137.1, 136.1, 135.2, 130.1, 129.8, 129.3, 128.6, 128.4, 128.1, 128.0, 127.5, 127.3; IR spectrum ( $\text{CDCl}_3$ ) 3057, 3027, 2924, 2854, 1452, 1428, 1390, 759, 668  $\text{cm}^{-1}$ ; HR-MS(FAB+) calcd for  $\text{C}_{23}\text{H}_{17}\text{N}$   $[\text{M}+\text{H}]^+$  308.1434; found 308.1432.

**(E)-2-(2-(1,2-diphenylvinyl)phenyl)-3,5-diphenylpyridine (5k)** white solid, mp = 110 °C,  $^1\text{H}$  NMR (400 MHz,  $\text{CDCl}_3$ )  $\delta$  8.48 (d,  $J$  = 1.7 Hz, 1H), 7.69 (d,  $J$  = 1.8 Hz, 1H), 7.55-7.49 (m, 3H), 7.47-7.42 (m, 3H), 7.40-7.28 (m, 5H), 7.15-7.11 (m, 3H), 7.04-7.03 (m, 3H), 6.99 (t,  $J$  = 7.3 Hz, 1H), 6.91 (t,  $J$  = 7.5 Hz, 2H), 6.81-6.79 (m, 2H), 6.51 (d,  $J$  = 7.1

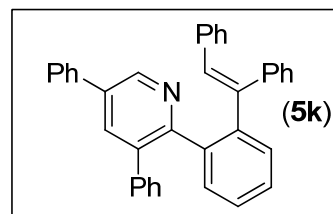

Hz, 2H), 5.83 (s, 1H);  $^{13}\text{C}$  NMR (100 MHz,  $\text{CDCl}_3$ )  $\delta$  156.8, 146.3, 144.0, 142.1, 140.3, 139.9, 139.7, 138.0, 137.6, 136.5, 135.9, 135.1, 131.3, 130.74, 130.71, 129.9, 129.7, 129.6, 129.2, 128.4, 128.2, 128.1, 127.9, 127.8, 127.3, 127.2, 126.79, 126.73; IR spectrum ( $\text{CDCl}_3$ ) 3057, 3025, 2952, 2931, 2856, 1598, 1492, 1424, 758, 696  $\text{cm}^{-1}$ ; HR-MS(EI+) calcd for  $\text{C}_{37}\text{H}_{27}\text{N}$   $[\text{M}]^+$  485.2143; found 485.2150.

**2,3,6-triphenylpyridine (5l)** [CAS No. 37786-68-8] white solid, mp = 106-108 °C,  $^1\text{H}$  NMR (400 MHz,  $\text{CDCl}_3$ )  $\delta$  8.16 (d,  $J$  = 7.2 Hz, 2H), 7.80-7.76 (m, 2H), 7.51-7.41 (m, 5H), 7.30-7.23 (m, 8H);  $^{13}\text{C}$  NMR (100 MHz,  $\text{CDCl}_3$ )  $\delta$  156.8, 155.8, 140.6, 140.2, 139.6, 139.2, 134.6, 130.4, 129.7, 129.1, 128.9, 128.5, 128.0, 127.3, 127.2, 118.7.

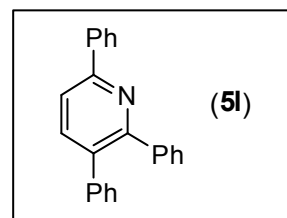

**2,3-dipropylpyridine (5m)** yellow oil,  $^1\text{H}$  NMR (400 MHz,  $\text{CDCl}_3$ )  $\delta$  8.37 (d,  $J$  = 2.9 Hz, 1H), 7.40 (d,  $J$  = 7.6 Hz, 1H), 7.03 (dd,  $J$  = 7.4, 4.8 Hz, 1H), 2.76 (t,  $J$  = 7.7 Hz, 2H), 2.58 (t,  $J$  = 7.6 Hz, 2H), 1.78-1.68 (m, 2H), 1.65-

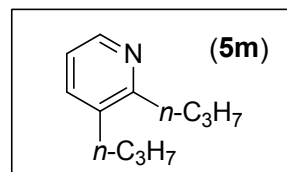

1.56 (m, 2H), 0.99 (q,  $J$  = 7.4 Hz, 6H);  $^{13}\text{C}$  NMR (100 MHz,  $\text{CDCl}_3$ )  $\delta$  160.3, 146.7, 136.9, 135.5, 121.5, 37.0, 34.4, 24.0, 23.1, 14.4, 14.2; IR spectrum ( $\text{CDCl}_3$ ) 3049, 2961, 2933, 2872, 1715, 1572, 1441, 1378, 1262, 1130, 1089, 789, 612  $\text{cm}^{-1}$ ; HR-MS(EI+) calcd for  $\text{C}_{11}\text{H}_{17}\text{N}$   $[\text{M}]^+$  163.1361; found 163.1365.

#### - Characterization data for 5n and 5o (Scheme 2)

**4-phenyl-2,3-dipropylpyridine (5n)** yellow oil,  $^1\text{H}$  NMR (400 MHz,  $\text{CDCl}_3$ )  $\delta$  8.37 (d,  $J = 4.8$  Hz, 1H), 7.43-7.37 (m, 3H), 7.26-7.24 (m, 2H), 6.92 (t,  $J = 4.8$  Hz 1H), 2.82 (t,  $J = 7.7$  Hz, 2H), 2.53 (t,  $J = 8.0$  Hz, 2H), 1.85-1.75 (m, 2H), 1.43-1.34 (m, 2H), 1.04 (t,  $J = 7.3$  Hz, 3H), 0.78 (t,  $J = 7.2$  Hz, 3H);  $^{13}\text{C}$  NMR (100 MHz,  $\text{CDCl}_3$ )  $\delta$  161.0, 150.3, 146.1, 140.5, 133.5, 128.7, 128.4, 127.7, 122.8, 37.5, 31.1, 24.4, 23.5, 14.66, 14.63; IR spectrum ( $\text{CDCl}_3$ ) 3055, 3029, 2960, 2930, 2871, 1579, 1546, 1496, 1456, 1404, 838, 762, 702  $\text{cm}^{-1}$ ; HR-MS(EI+) calcd for  $\text{C}_{17}\text{H}_{21}\text{N}$   $[\text{M}]^+$  239.1674; found 239.1676.

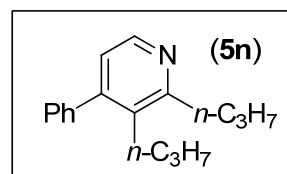

**3,4-Dipropylisoquinoline (5o)** [CAS No. 1185276-02-1] yellow oil,  $^1\text{H}$  NMR (400 MHz,  $\text{CDCl}_3$ )  $\delta$  9.08 (s, 1H), 7.96 (d,  $J = 8.5$  Hz, 1H), 7.90 (d,  $J = 8.0$  Hz, 1H), 7.66 (t,  $J = 7.5$  Hz, 1H), 7.50 (t,  $J = 7.5$  Hz, 1H), 3.01 (t,  $J = 7.8$  Hz, 2H), 2.95 (t,  $J = 7.5$  Hz, 2H), 1.86-1.77 (m, 2H), 1.73-1.63 (m, 2H), 1.09 (t,  $J = 7.2$  Hz, 3H), 1.04 (t,  $J = 7.2$  Hz, 3H);  $^{13}\text{C}$  NMR (100 MHz,  $\text{CDCl}_3$ )  $\delta$  153.0, 150.2, 135.5, 130.1, 128.3, 128.2, 127.3, 125.8, 123.1, 37.4, 30.0, 24.2, 23.8, 14.8, 14.5.

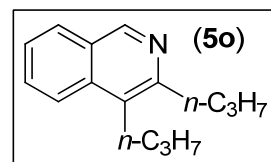

## $^1\text{H}$ and $^{13}\text{C}$ NMR spectra for new compounds

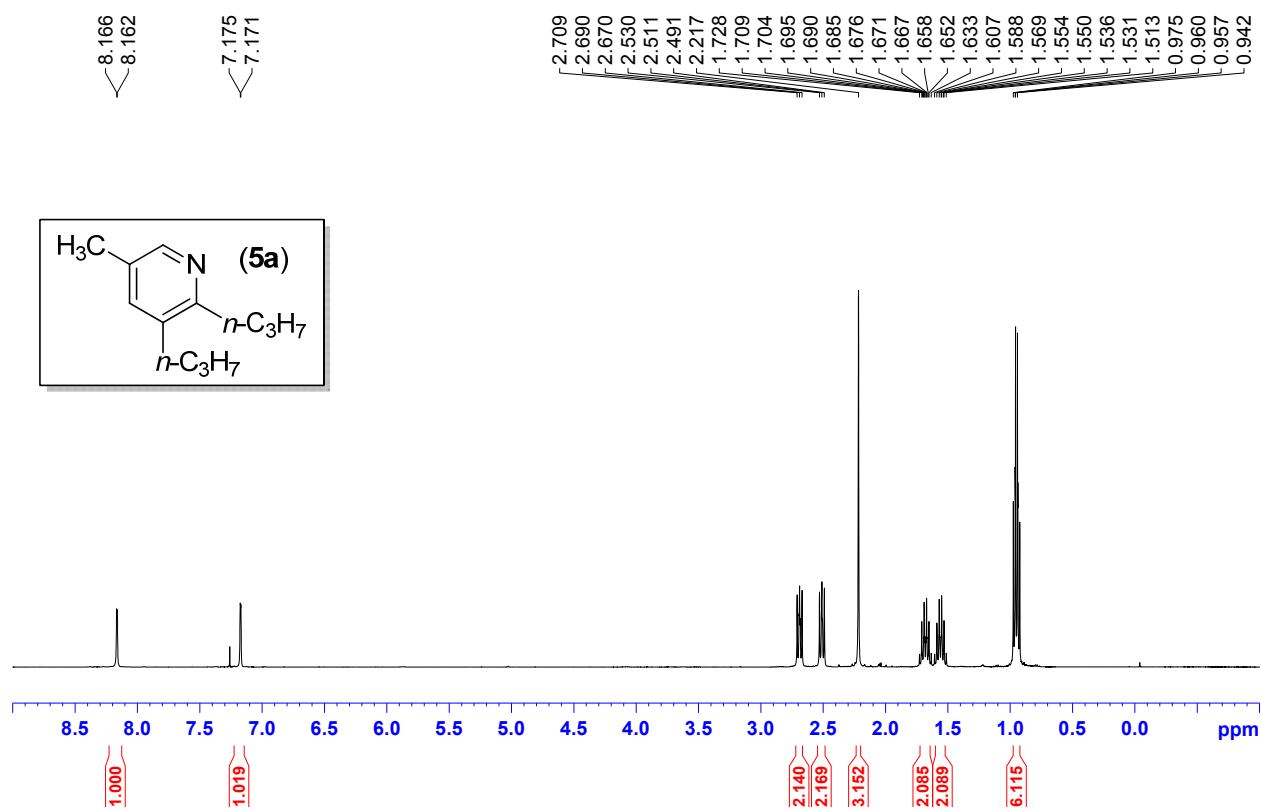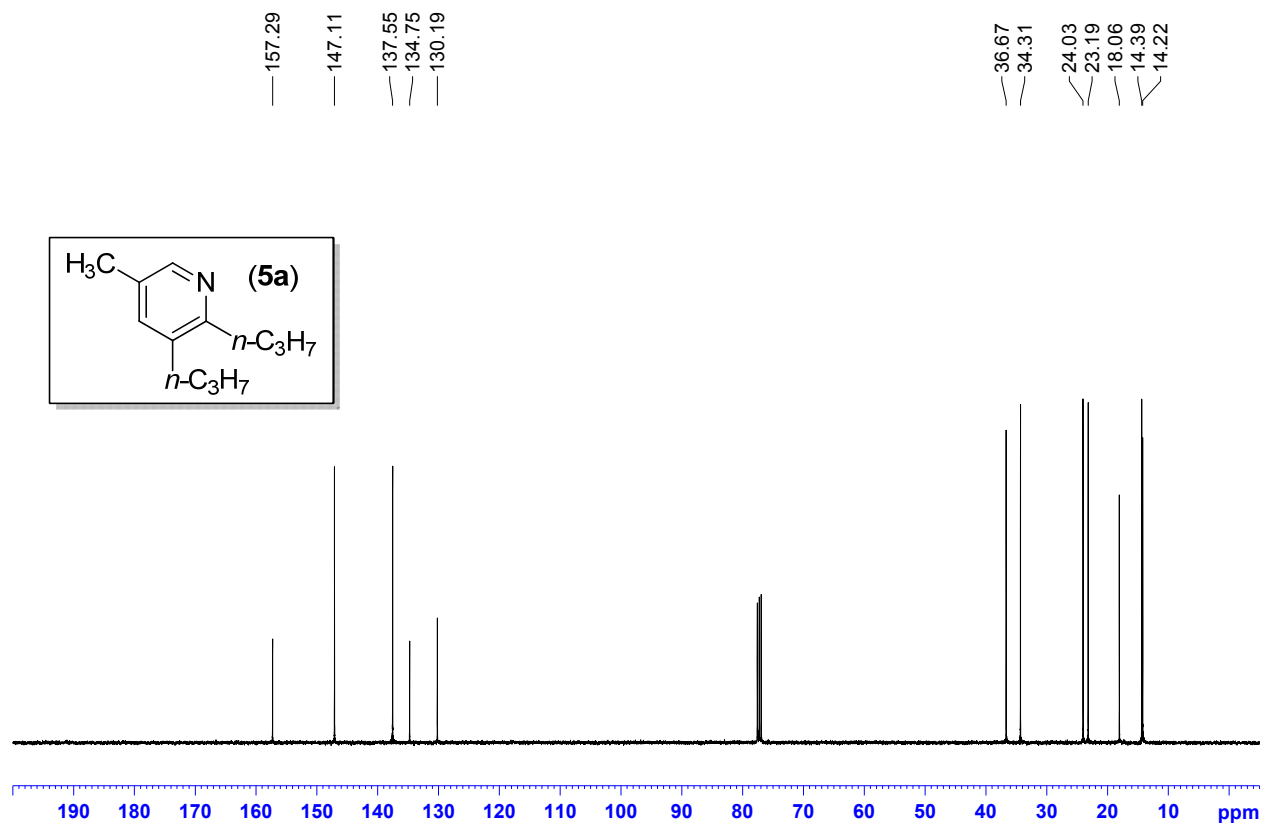



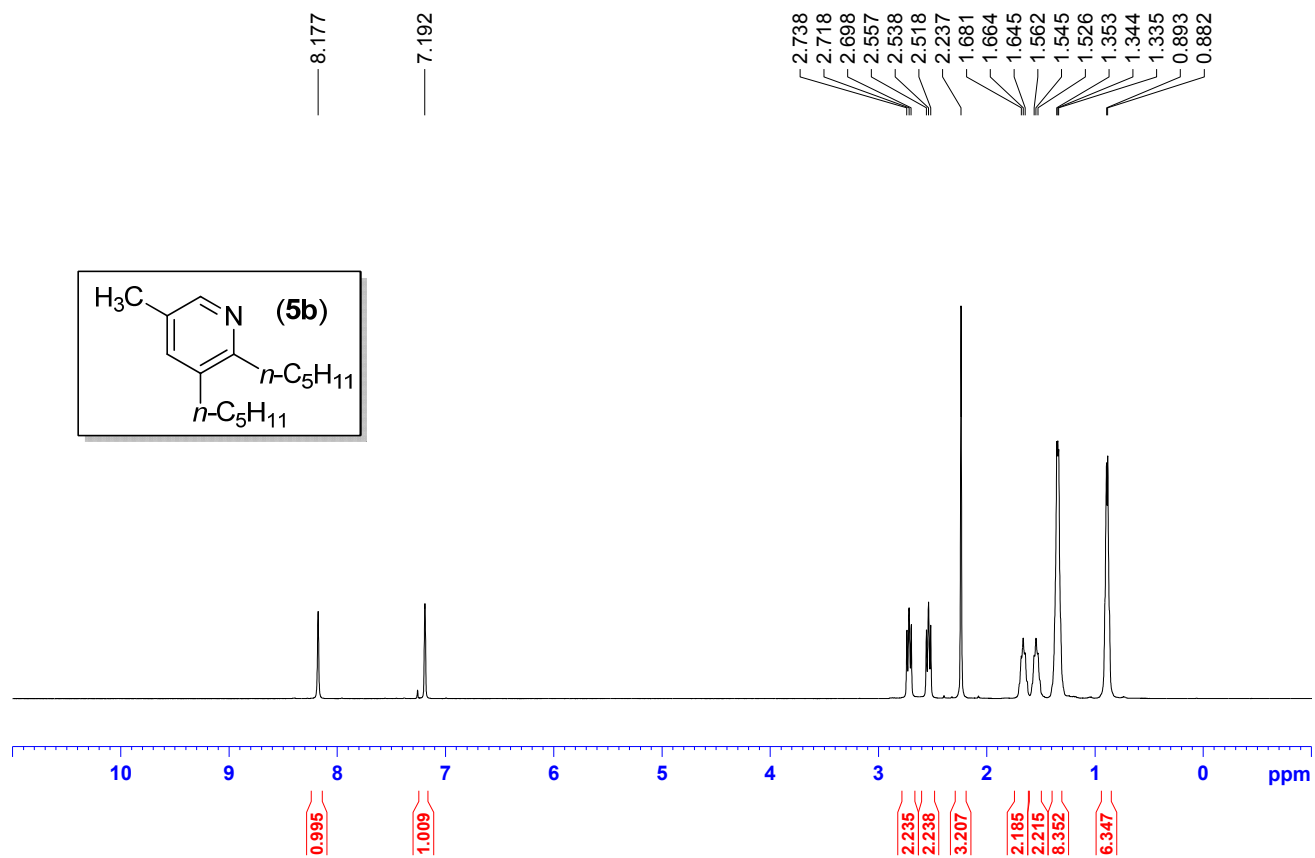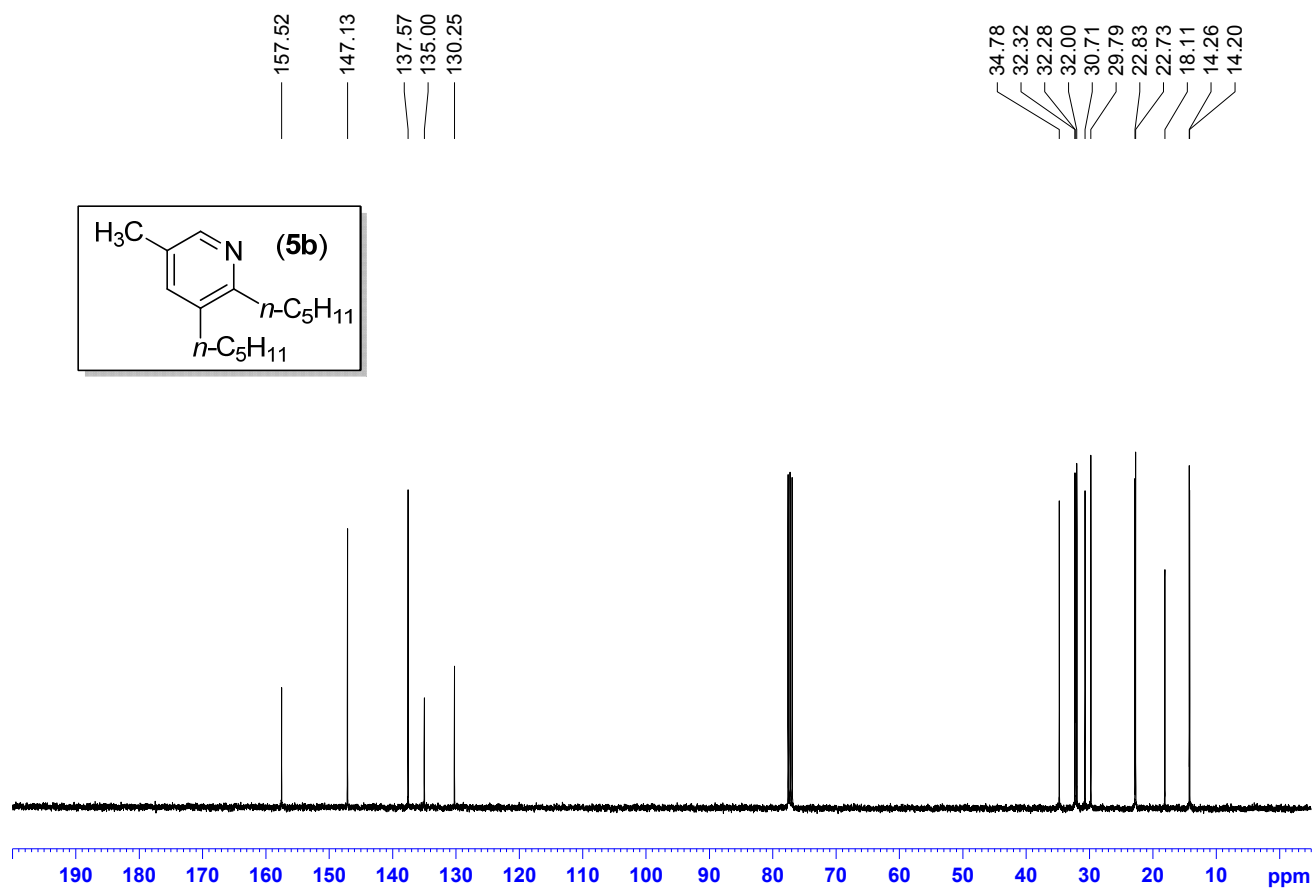

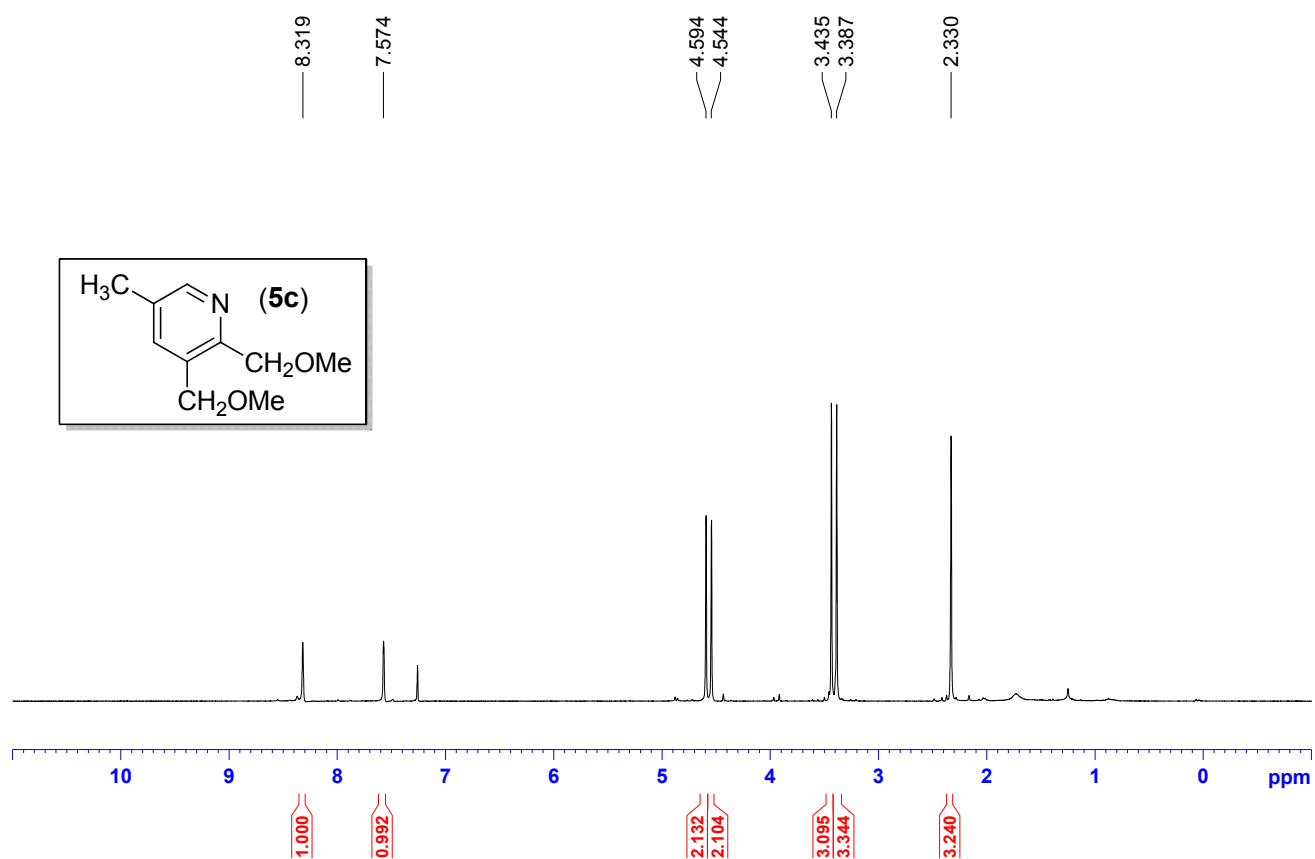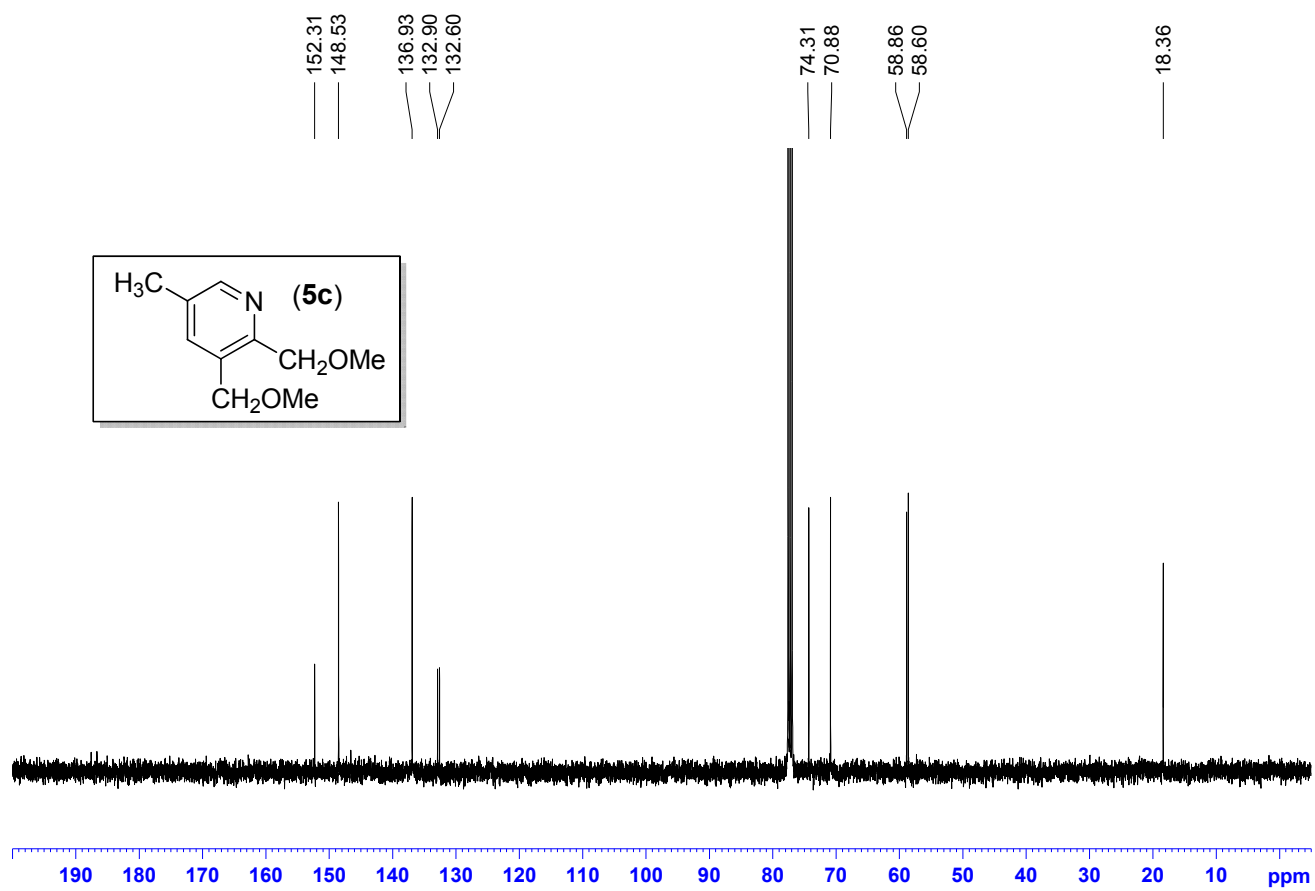

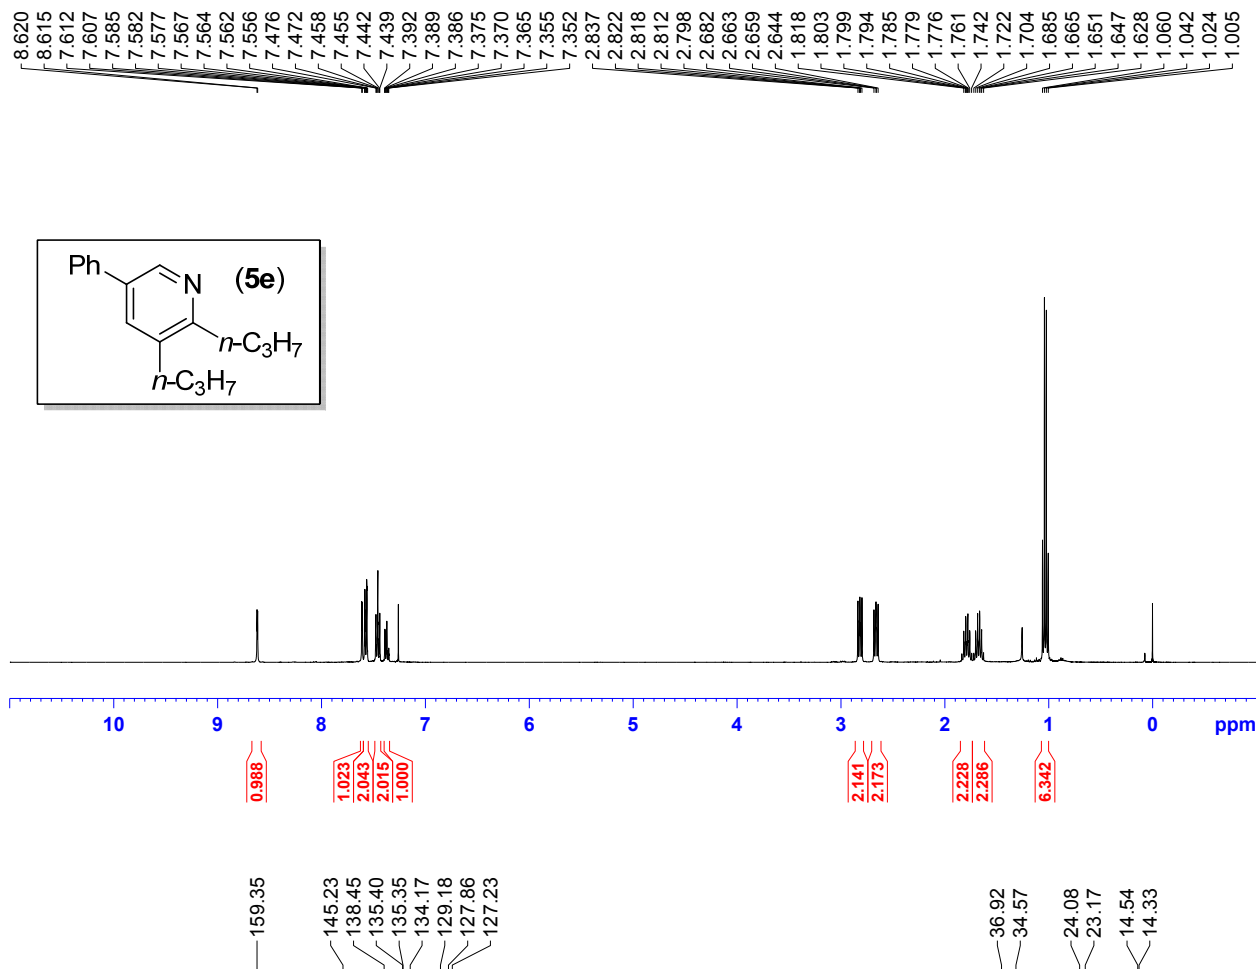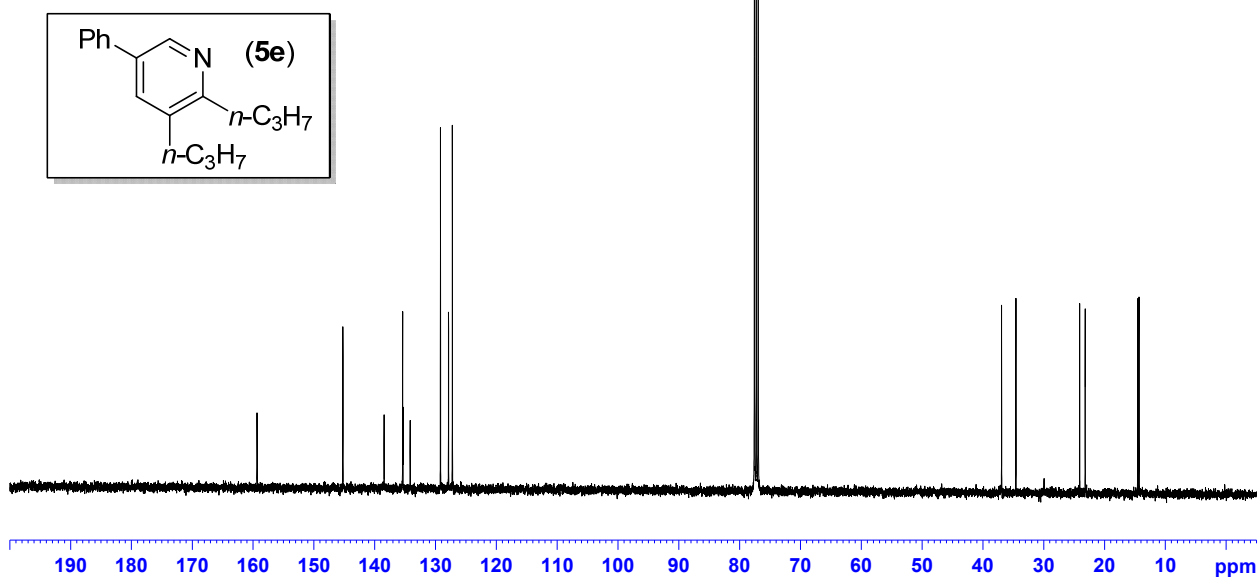



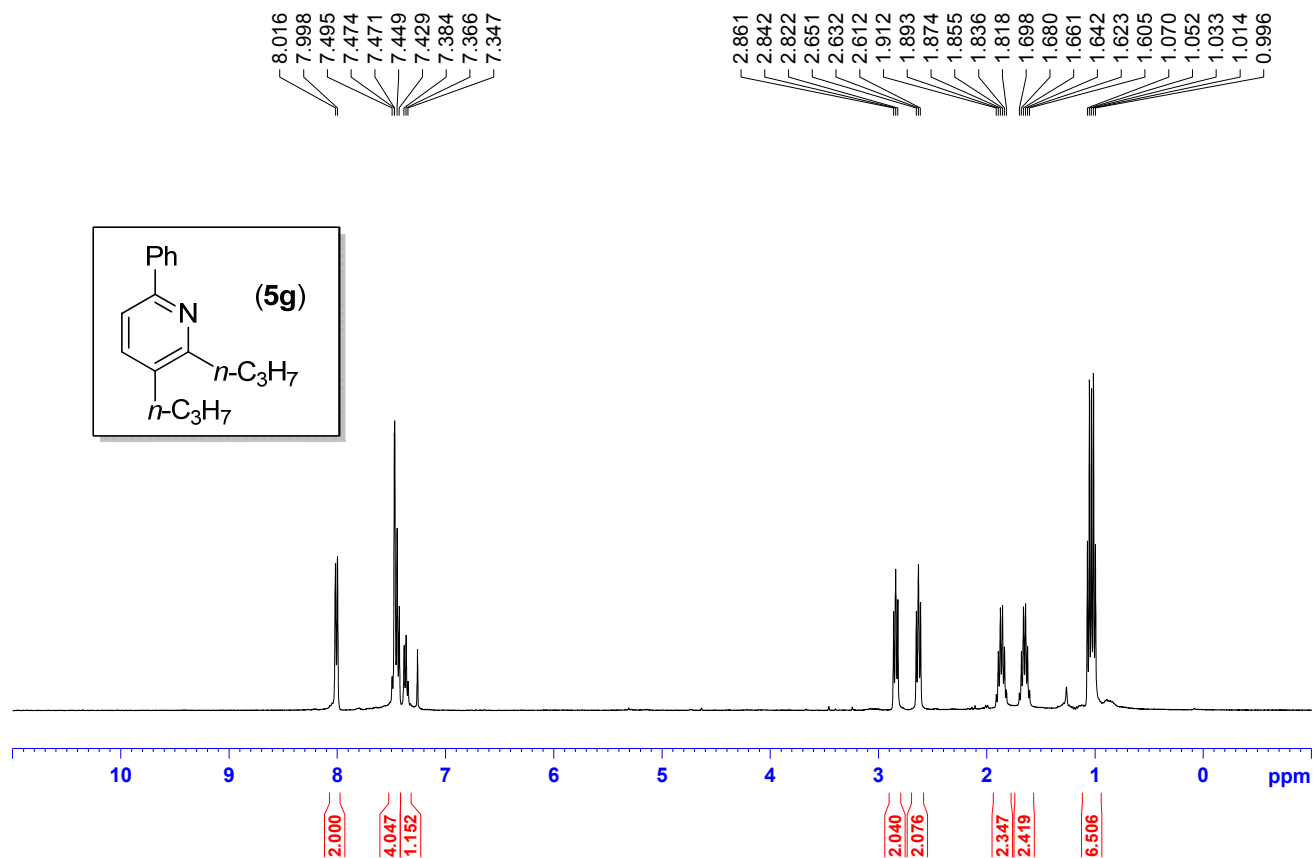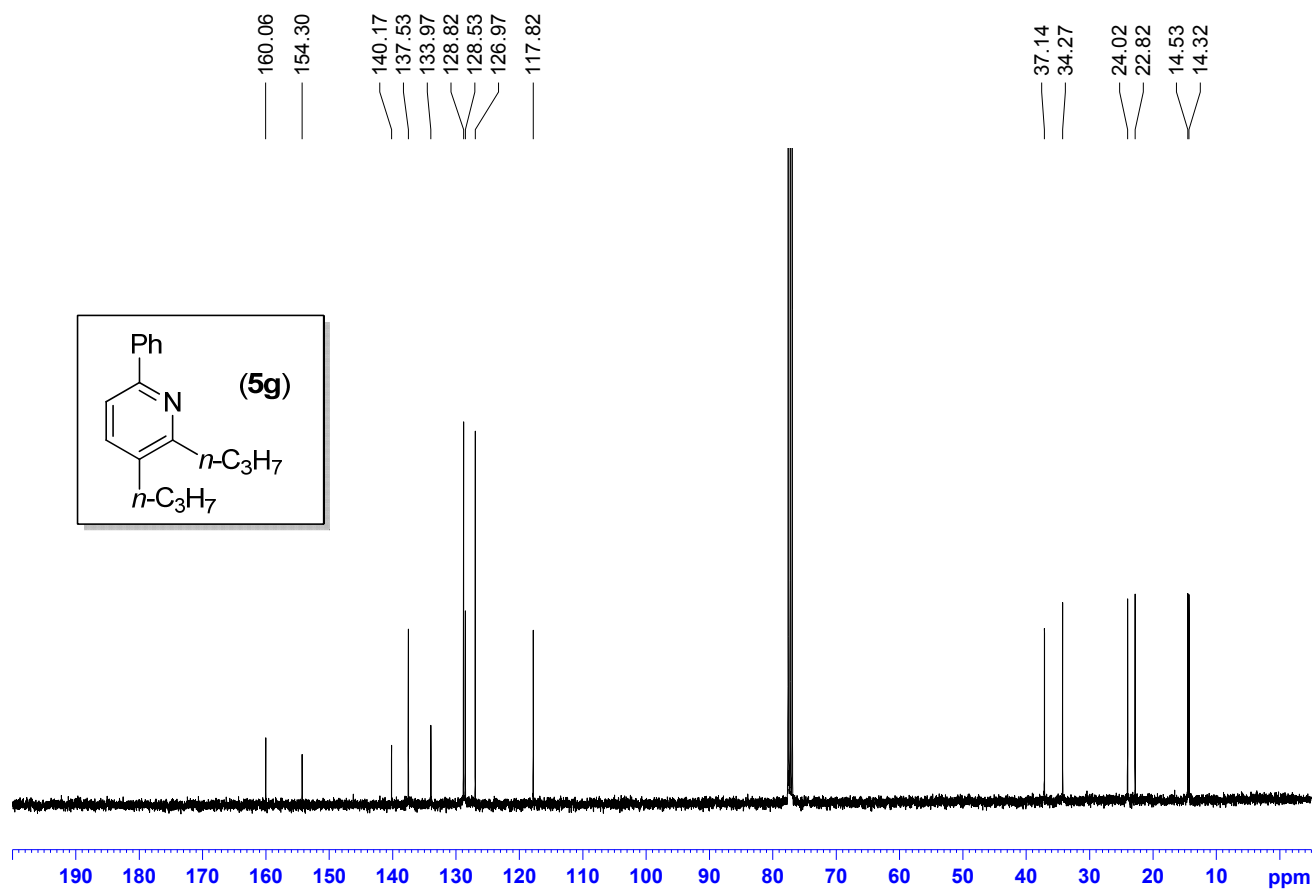

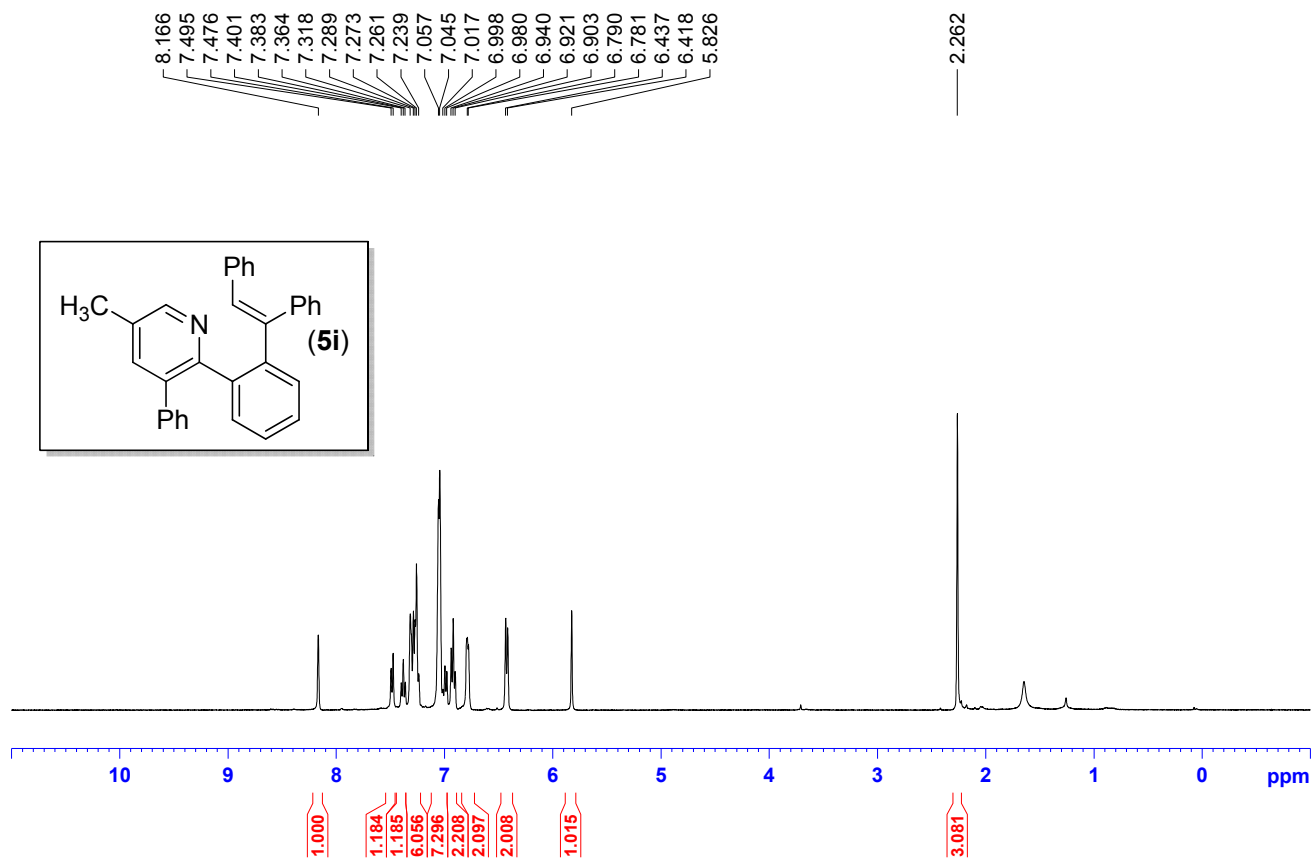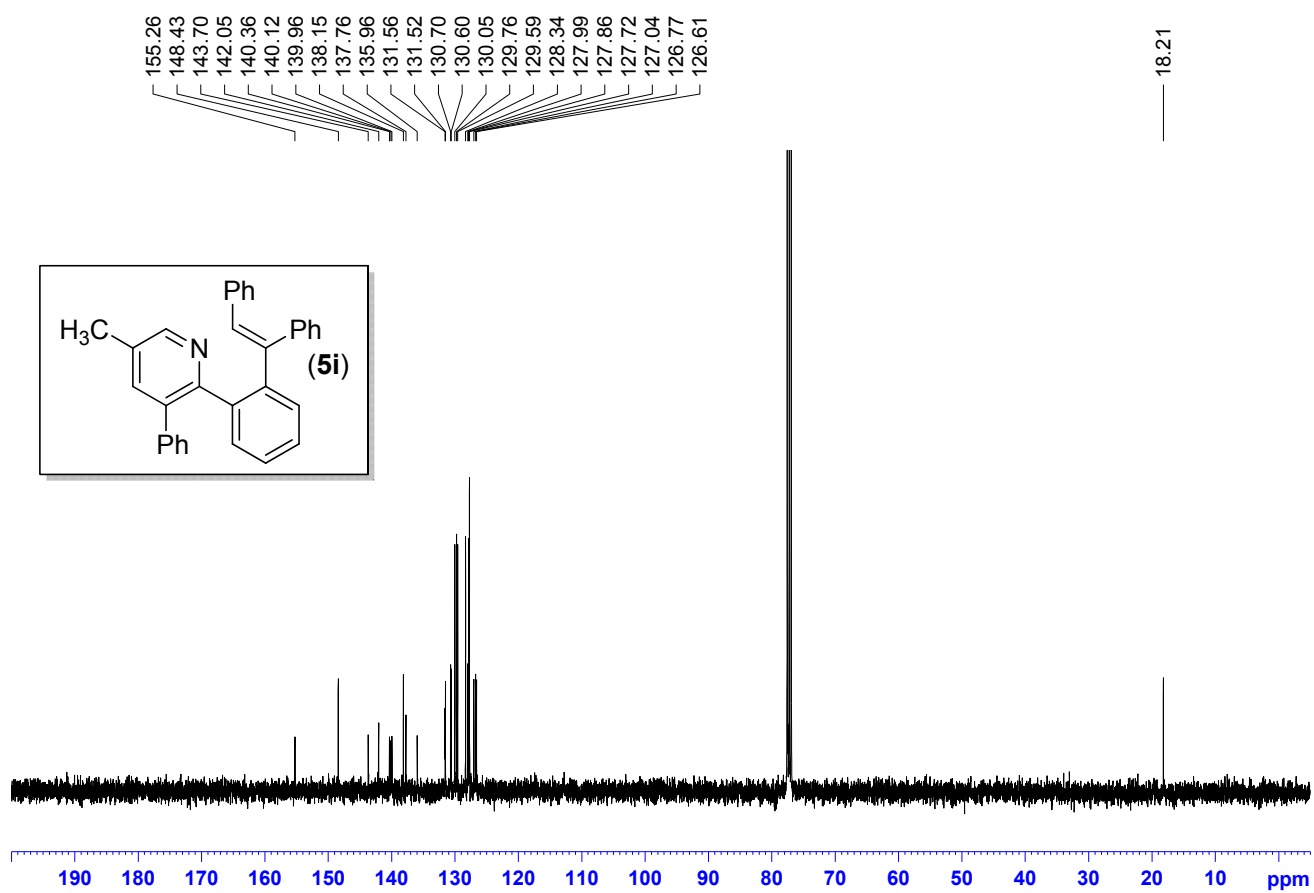

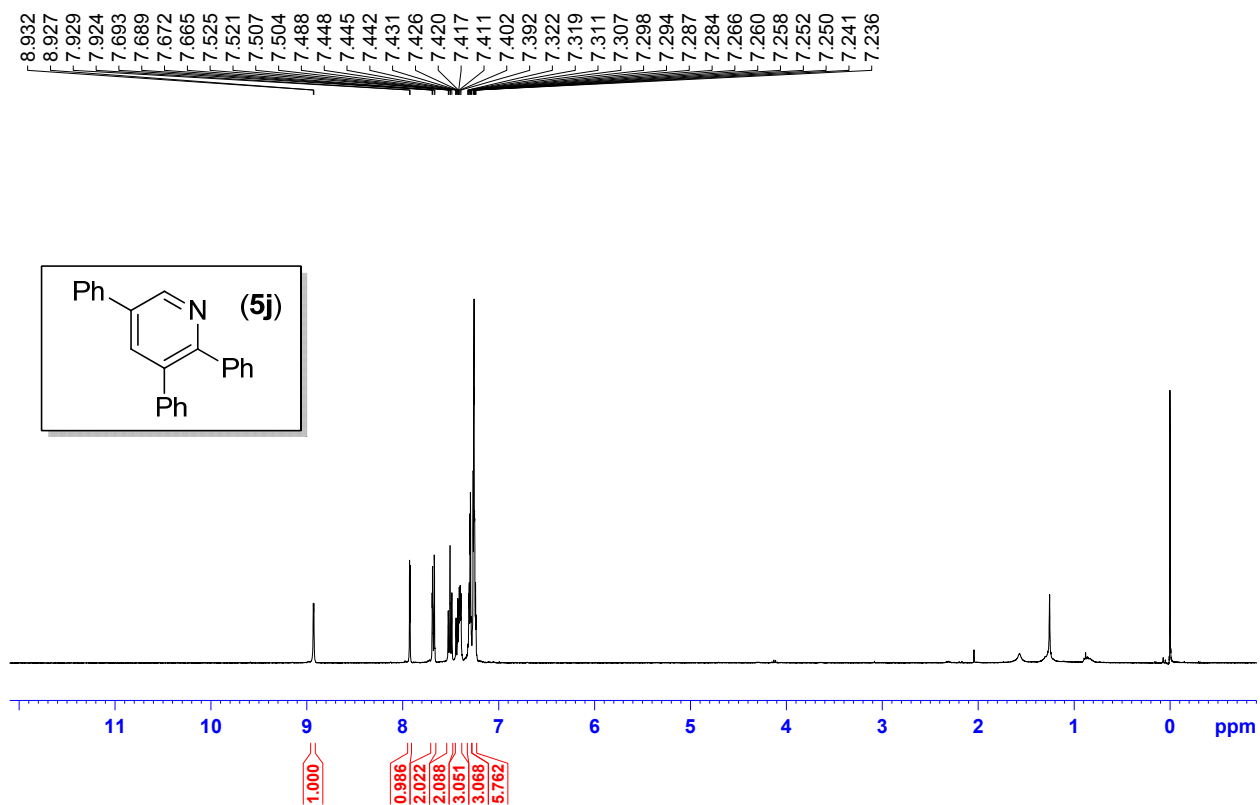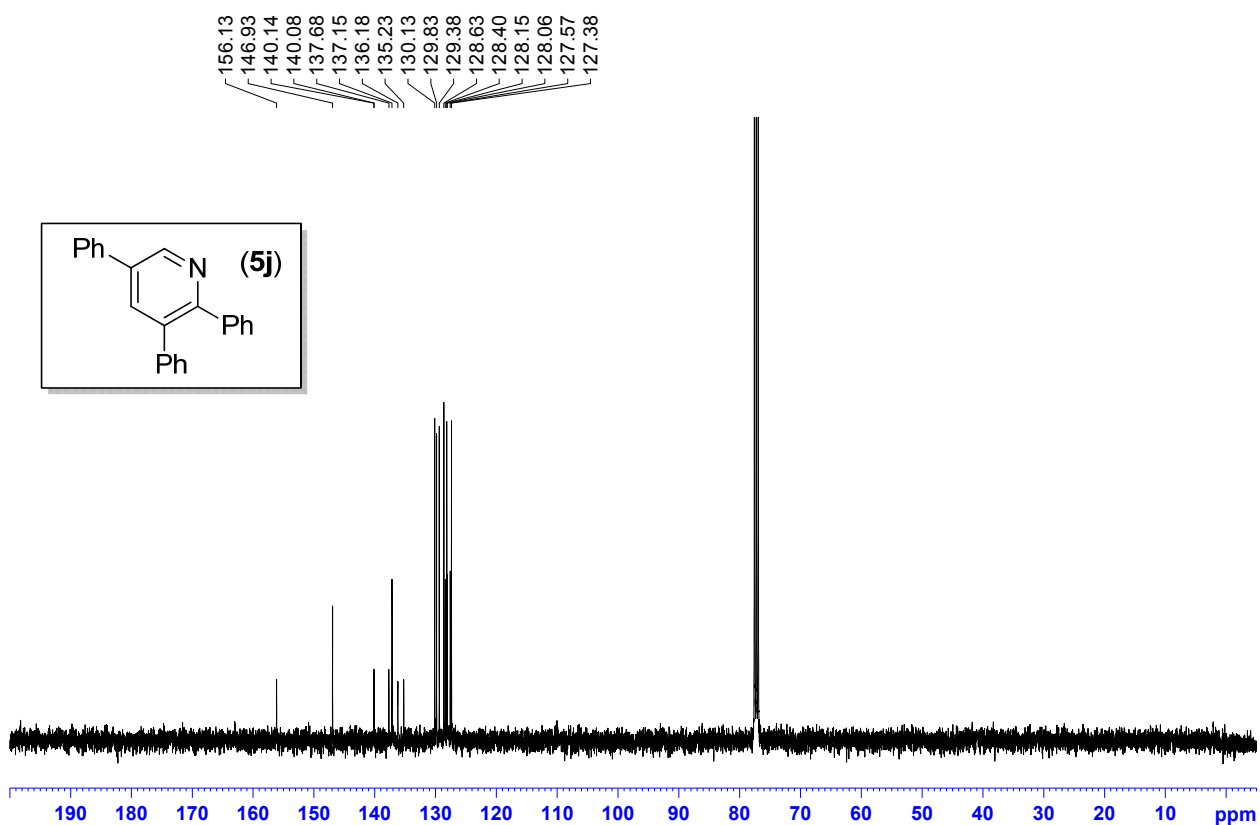

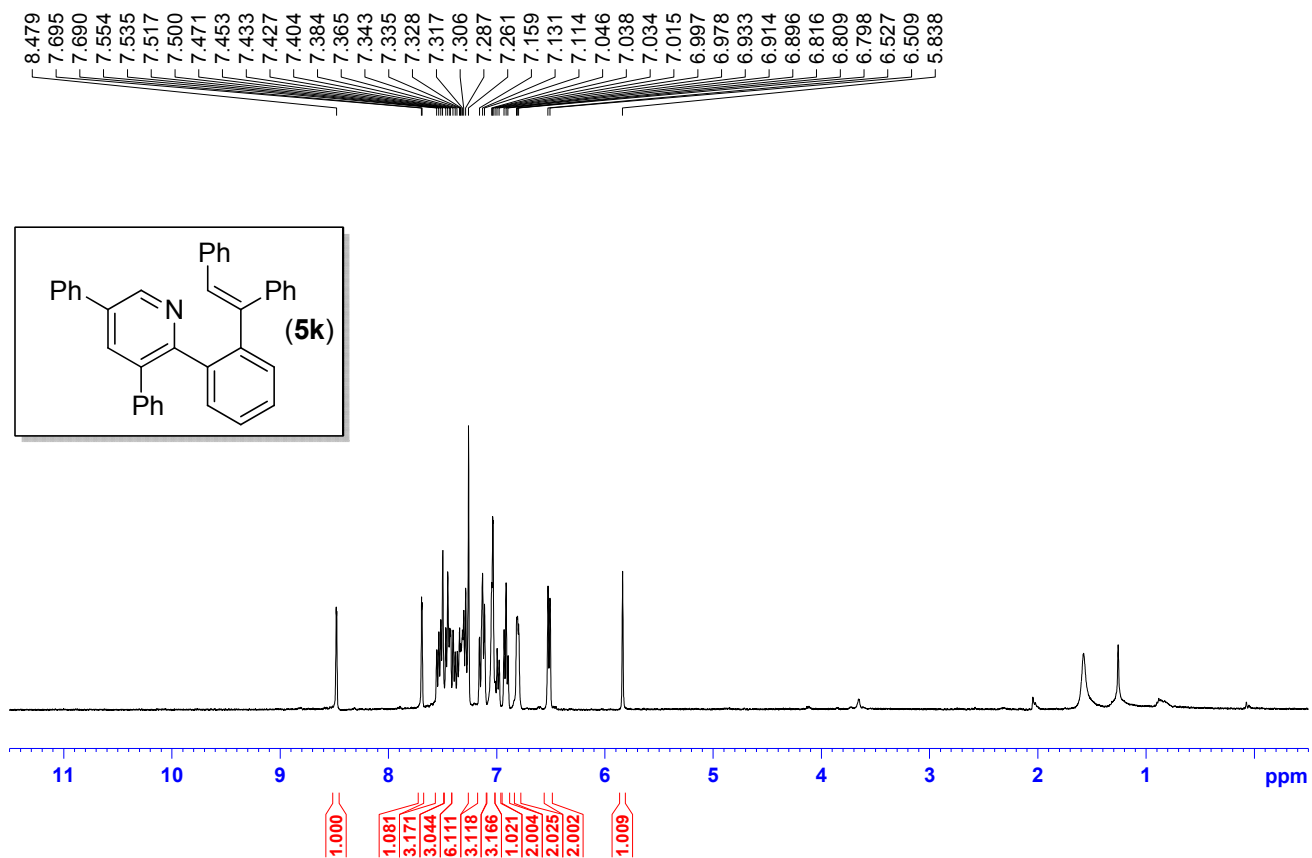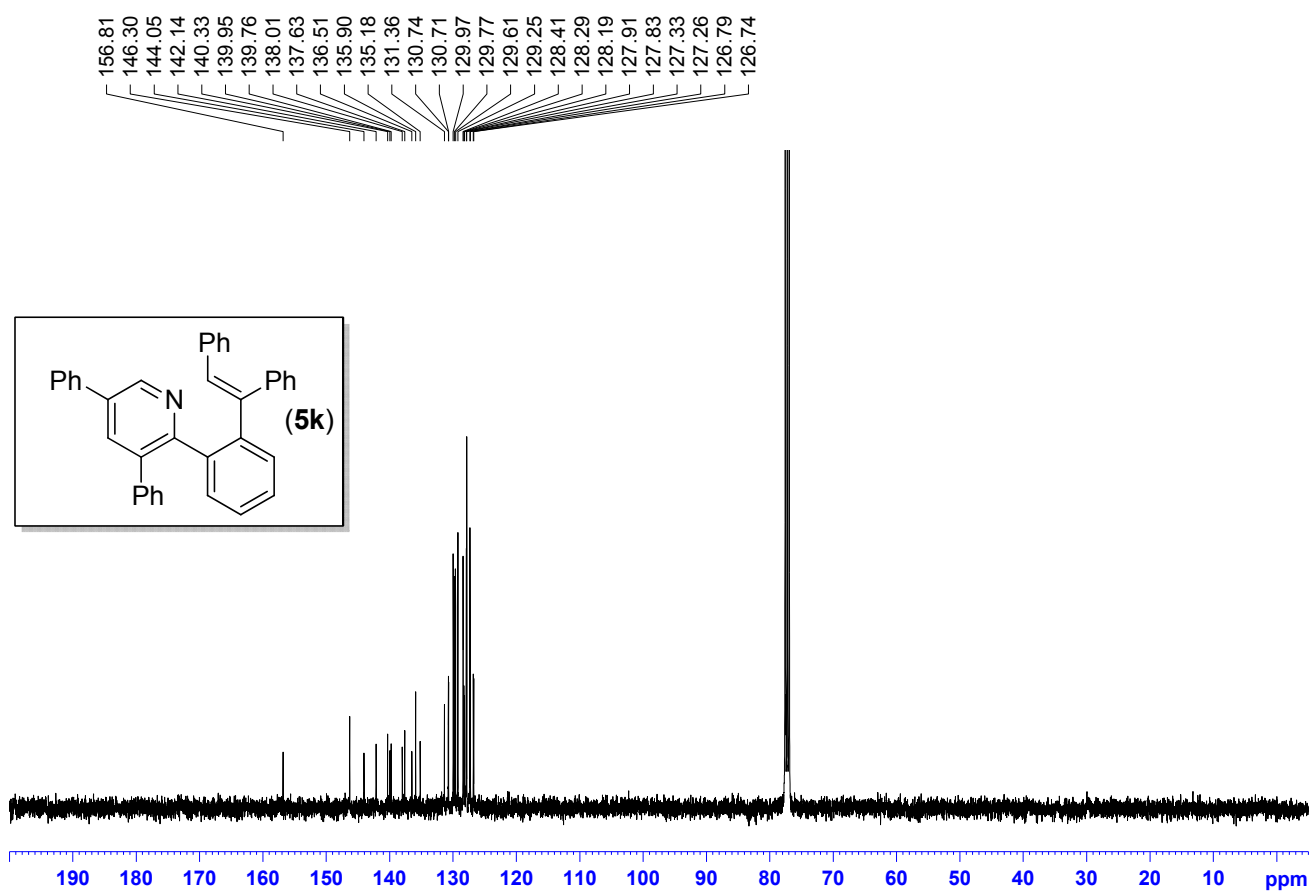



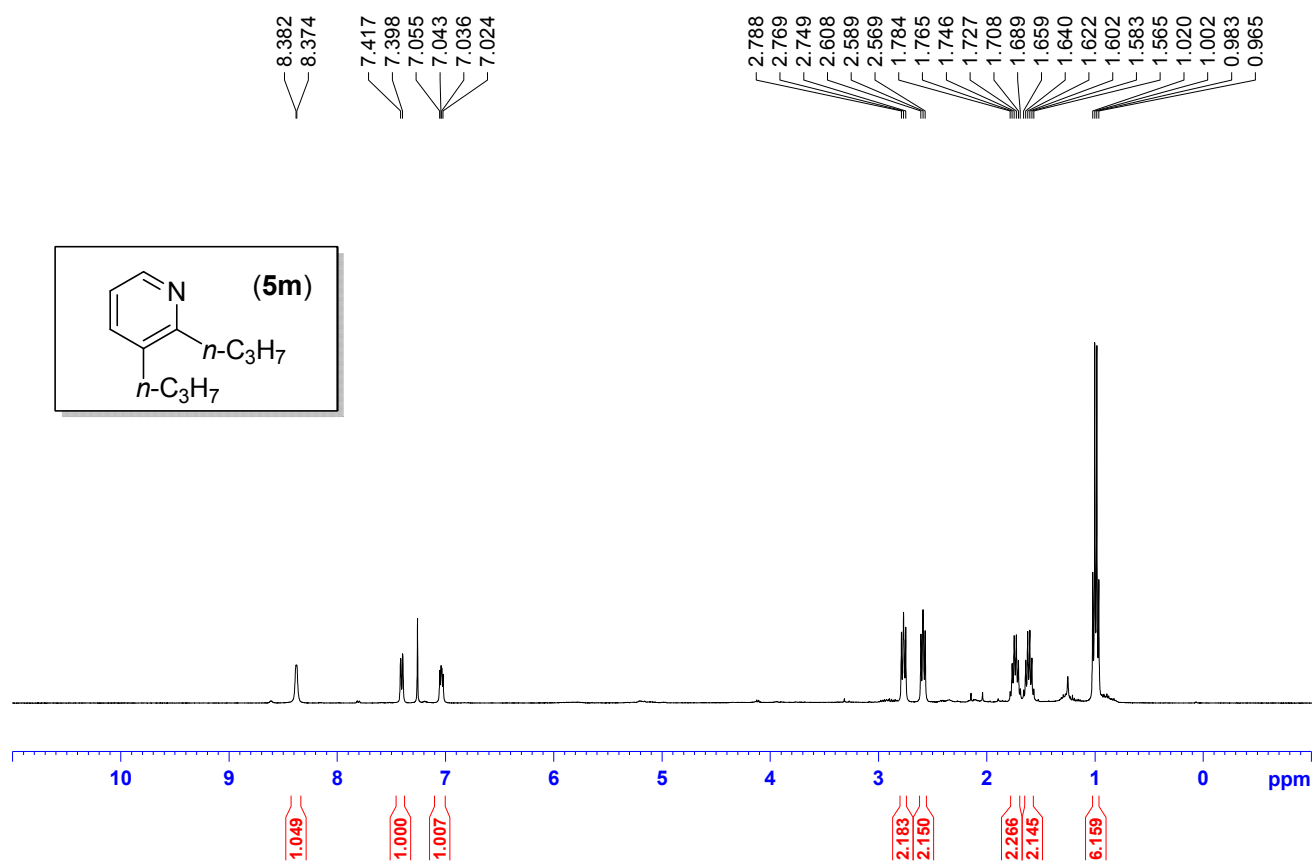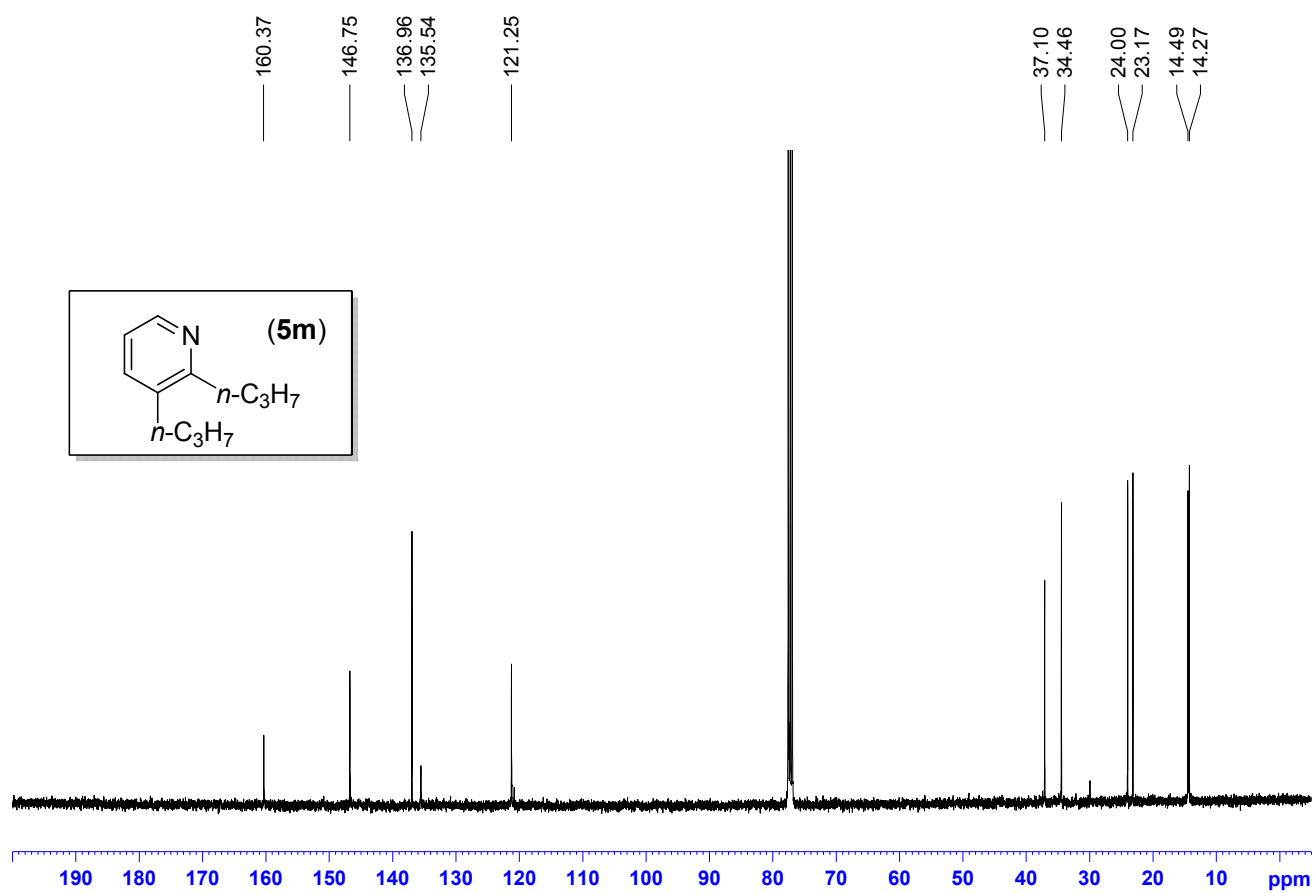

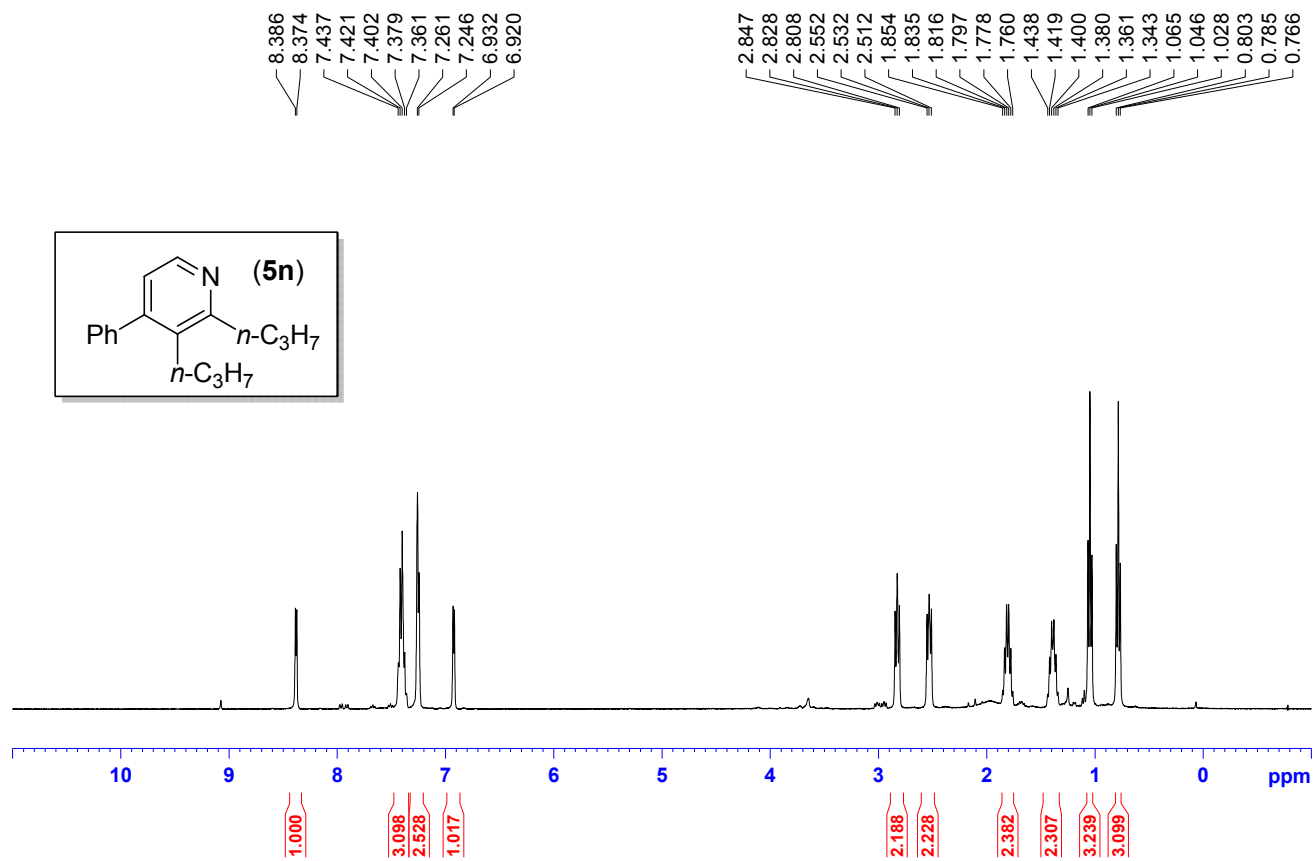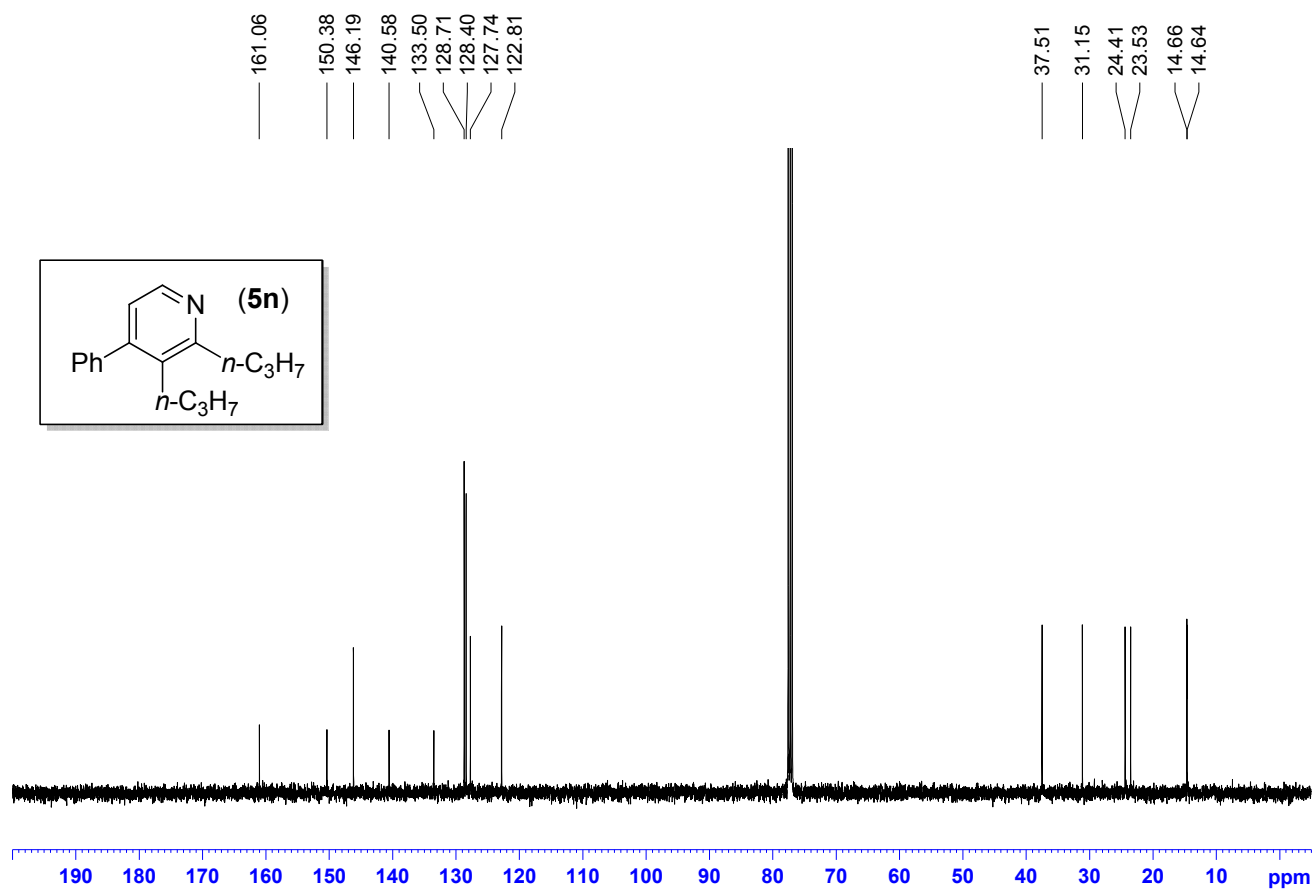

Supplement: c2cc36699a.pdf [file c2cc36699a.pdf]
